# Supplementary material for: Lactobacillus acidophilus DDS-1 and Bifidobacterium lactis UABla-12 Improve Abdominal Pain Severity and Symptomology in Irritable Bowel Syndrome: Randomized Controlled Trial
Source: PubMed Central journal article supplement (PMC7071206; doi:10.3390/nu12020363), 2020-01-30
Supplement: nutrients-12-00363-s001.pdf [file nutrients-12-00363-s001.pdf]

**Table S1.** Daily stool frequency over intervention period

|                                                                  |                | Placebo<br>(n = 109) | <i>L. acidophilus</i><br>DDS-1 (n = 111) | <i>B. lactis</i> UABla-<br>12 (n = 110) | p Value <sup>†</sup> |
|------------------------------------------------------------------|----------------|----------------------|------------------------------------------|-----------------------------------------|----------------------|
| Stool Frequency                                                  |                |                      |                                          |                                         |                      |
| Day 0                                                            | Mean (SD)      | 2.7 (1.4)            | 2.7 (1.5)                                | 2.7 (1.4)                               | 0.530                |
|                                                                  | Median (Range) | 2.2 (0.4-6.0)        | 2.1 (0.4-6.1)                            | 2.3 (0.5-6.2)                           |                      |
| Day 21                                                           | Mean (SD)      | 2.7 (1.5)            | 2.6 (1.5)                                | 2.6 (1.4)                               | 0.187                |
|                                                                  | Median (Range) | 2.3 (0.6-6.1)        | 2.0 (0.4-6.0)                            | 2.2 (0.4-6.2)                           |                      |
| Day 42                                                           | Mean (SD)      | 2.8 (1.5)            | 2.3 (1.4)                                | 2.4 (1.2)                               | 0.410                |
|                                                                  | Median (Range) | 2.3 (0.4-5.6)        | 1.7 (0.4-5.8)                            | 2.2 (0.4-5.5)                           |                      |
| <sup>†</sup> Between group comparison, Pearson Chi Square U test |                |                      |                                          |                                         |                      |

**Table S2.** IBS quality of life and perceived stress scores over intervention period

|                      | Mean (SD)            |                                          |                                         | pValue <sup>†</sup>  |                         |                       |
|----------------------|----------------------|------------------------------------------|-----------------------------------------|----------------------|-------------------------|-----------------------|
|                      | Placebo<br>(n = 109) | <i>L. acidophilus</i><br>DDS-1 (n = 111) | <i>B. lactis</i> UABla-<br>12 (n = 110) | DDS-1 vs.<br>Placebo | UABla-12<br>vs. Placebo | DDS-1 vs.<br>UABla-12 |
| IBS-QoL Total Score  |                      |                                          |                                         |                      |                         |                       |
| Day 0                | 66.17 (18.26)        | 68.21 (22.35)                            | 68.12 (21.52)                           | 0.882                | 0.786                   | 0.939                 |
| Day 21               | 62.21 (17.80)        | 62.51 (20.97)                            | 63.88 (19.76)                           | 0.762                | 0.723                   | 0.462                 |
| Day 42               | 59.68 (19.40)        | 53.94 (17.97)                            | 58.45 (21.91)                           | 0.016                | 0.367                   | 0.130                 |
| PSS Total Score      |                      |                                          |                                         |                      |                         |                       |
| Day 0                | 16.07 (6.42)         | 15.92 (7.12)                             | 15.71 (6.77)                            | 0.253                | 0.691                   | 0.585                 |
| Day 21               | 16.04 (6.49)         | 13.89 (6.68)                             | 14.80 (7.06)                            | 0.002                | 0.030                   | 0.356                 |
| Day 42               | 14.67 (6.61)         | 13.06 (6.85)                             | 13.79 (7.13)                            | 0.023                | 0.238                   | 0.306                 |
| PSS Negative Factors |                      |                                          |                                         |                      |                         |                       |
| Day 0                | 9.30 (4.62)          | 9.53 (4.83)                              | 9.16 (4.40)                             | 0.745                | 0.756                   | 0.563                 |
| Day 21               | 9.05 (4.48)          | 8.15 (4.24)                              | 8.77 (4.61)                             | 0.118                | 0.578                   | 0.336                 |
| Day 42               | 8.43 (4.38)          | 7.67 (4.30)                              | 8.00 (4.53)                             | 0.160                | 0.342                   | 0.518                 |
| PSS Positive Factors |                      |                                          |                                         |                      |                         |                       |
| Day 0                | 6.77 (2.75)          | 6.39 (2.94)                              | 6.55 (2.98)                             | 0.772                | 0.741                   | 0.940                 |
| Day 21               | 6.99 (2.96)          | 5.74 (2.80)                              | 6.03 (2.97)                             | 0.014                | 0.192                   | 0.275                 |
| Day 42               | 6.24 (2.99)          | 5.39 (3.12)                              | 5.79 (3.10)                             | 0.051                | 0.186                   | 0.427                 |

<sup>†</sup>Between group comparison, Mann Whitney U test

IBS-QoL: Irritable Bowel Syndrome-Quality of Life; PSS: Perceived Stress Scale;

**Table S3.** Study product tolerability and compliance over intervention period

|                            |         | Placebo     | <i>L. acidophilus</i><br>DDS-1 | <i>B. lactis</i><br>UABla-12 | <i>p</i> Value     |
|----------------------------|---------|-------------|--------------------------------|------------------------------|--------------------|
| Tolerability, <i>n</i> (%) | Good    | 76 (71.7)   | 73 (68.2)                      | 71 (67.6)                    | 0.753 <sup>†</sup> |
|                            | Average | 28 (26.4)   | 30 (28.0)                      | 30 (28.6)                    |                    |
|                            | Poor    | 2 (1.9)     | 4 (3.7)                        | 4 (3.8)                      |                    |
| Compliance, Mean (SD)      |         | 0.99 (0.02) | 1.00 (0.01)                    | 1.00 (0.01)                  | 0.846 <sup>‡</sup> |

<sup>†</sup>Between group comparison, Pearson Chi Square test  
<sup>‡</sup>Between group comparison, One Way Anova

**Table S4.** Safety variables over intervention period

|                                    | Placebo<br>( <i>n</i> = 109) | <i>L. acidophilus</i><br>DDS-1 ( <i>n</i> = 111) | <i>B. lactis</i> UABla-<br>12 ( <i>n</i> = 110) |
|------------------------------------|------------------------------|--------------------------------------------------|-------------------------------------------------|
|                                    | Mean (SD)                    | Mean (SD)                                        | Mean (SD)                                       |
| Systolic Blood Pressure            |                              |                                                  |                                                 |
| Day 0                              | 119.42 (8.28)                | 119.80 (9.03)                                    | 119.87 (8.31)                                   |
| Day 21                             | 119.86 (7.71)                | 119.54 (8.06)                                    | 121.09 (7.75)                                   |
| Day 42                             | 118.75 (7.56)                | 119.10 (7.43)                                    | 119.87 (7.44)                                   |
| <i>p</i> (Day 0 – 21) <sup>†</sup> | 0.479                        | 0.723                                            | 0.066                                           |
| <i>p</i> (Day 0 – 42) <sup>†</sup> | 0.356                        | 0.288                                            | 1.000                                           |
| Diastolic Blood Pressure           |                              |                                                  |                                                 |
| Day 0                              | 75.81 (7.07)                 | 77.43 (6.49)                                     | 76.73 (7.15)                                    |
| Day 21                             | 75.80 (6.98)                 | 76.84 (6.89)                                     | 76.80 (7.16)                                    |
| Day 42                             | 75.77 (6.90)                 | 77.22 (5.83)                                     | 76.49 (6.63)                                    |
| <i>p</i> (Day 0 – 21) <sup>†</sup> | 0.989                        | 0.320                                            | 0.909                                           |
| <i>p</i> (Day 0 – 42) <sup>†</sup> | 0.939                        | 0.738                                            | 0.678                                           |
| Pulse Rate                         |                              |                                                  |                                                 |
| Day 0                              | 78.15 (8.70)                 | 76.96 (7.73)                                     | 78.26 (8.16)                                    |
| Day 21                             | 77.01 (8.09)                 | 77.64 (7.13)                                     | 78.17 (7.89)                                    |
| Day 42                             | 77.36 (7.10)                 | 77.42 (7.70)                                     | 78.89 (7.99)                                    |
| <i>p</i> (Day 0 – 21) <sup>†</sup> | 0.076                        | 0.183                                            | 0.878                                           |
| <i>p</i> (Day 0 – 42) <sup>†</sup> | 0.242                        | 0.444                                            | 0.348                                           |

<sup>†</sup>Within group comparison, Paired t-test
